# Supplementary material for: Modeling the Impact of Climate Changes on Crop Yield: Irrigated vs. Non-Irrigated Zones in Mississippi
Source: MDPI journal article supplement (doi:10.3390/rs13122249), 2021-06-09
Supplement: s1 [file s1]

## **Supplementary Information**

### **Modeling the impact of climate change on crop yield in Mississippi**

Sadia Alam Shammi, Qingmin Meng\*

\*Correspondence: e-mail: [qmeng@geosci.msstate.edu](mailto:qmeng@geosci.msstate.edu); Tel.: +1-662-325-0409

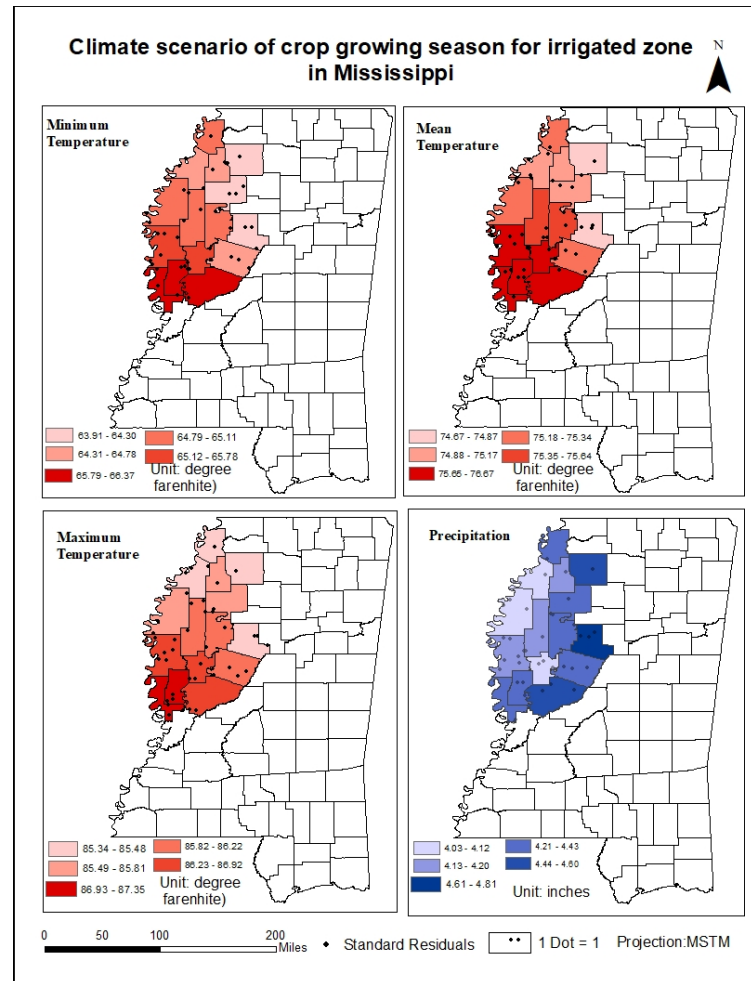

**Figure S1.** The grid map of Climatic variables, such as minimum temperature (a), mean temperature (b), maximum temperature (c), Precipitation (d), and residuals from best yield model for the irrigated zone of Mississippi.

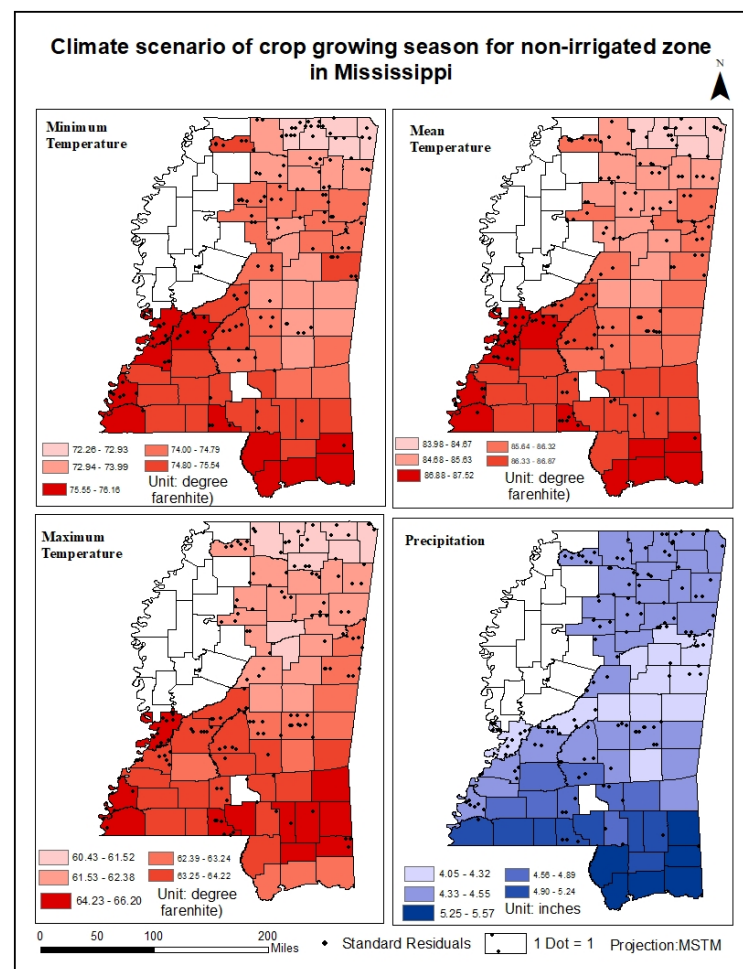

**Figure S2.** The grid map of Climatic variables, such as minimum temperature (a), mean temperature (b), maximum temperature (c), Precipitation (d), and residuals from best yield model for the non-irrigated zone of Mississippi.

Table S1. The results of Mann-Kendal test for the Tmin, Tmean, Tmax, Precipitation, and Yield from time series of 1980-2019 for irrigated and non-irrigated zone of Mississippi.

| Zone              | Parameter     | Trend      | Hypothesis | P-value  | Z-value | Kendall<br>Tau | Mann-Kendall's<br>score |
|-------------------|---------------|------------|------------|----------|---------|----------------|-------------------------|
| Irrigated         | Tmin          | Increasing | True       | <0.00001 | 7.855   | 0.237          | 28359                   |
|                   | Tmean         | Increasing | True       | <0.00001 | 5.0011  | 0.151          | 18054.0                 |
|                   | Tmax          | No trend   | False      | 0.141    | 1.469   | 0.044          | 5307.0                  |
|                   | Precipitation | Increasing | True       | <0.00001 | 4.794   | 0.145          | 17309.0                 |
|                   | Yield         | Increasing | True       | 0.000    | 24.987  | 0.755          | 90202.0                 |
| Non-<br>irrigated | Tmin          | Increasing | True       | <0.00001 | 4.097   | 0.0641         | 105929                  |
|                   | Tmean         | No trend   | False      | 0.979    | -0.026  | 0.0004         | -678.0                  |
|                   | Tmax          | Decreasing | True       | <0.00000 | -5.147  | -0.081         | -133047                 |
|                   | Precipitation | Increasing | True       | <0.00001 | 6.201   | 0.097          | 160313.0                |
|                   | Yield         | Increasing | True       | 0.0000   | 49.685  | 0.777          | 1284239                 |

Hypothesis used  
"there is a trend of  
the data for the

increase or decrease of the values for each variable of the study period". P-value is the level of significance. The details are explained in the following link ([https://vsp.pnnl.gov/help/vsample/design\\_trend\\_mann\\_kendall.htm](https://vsp.pnnl.gov/help/vsample/design_trend_mann_kendall.htm))

Table S2. The results of linear and multilinear models for each 10- year period from time series of 1980-2019 for irrigated county of Mississippi.

| Period    | Model name                                      | Intercept | Model Slope for different parameters |       |       |               | Adjusted R-square | BIC   | AIC   |
|-----------|-------------------------------------------------|-----------|--------------------------------------|-------|-------|---------------|-------------------|-------|-------|
|           |                                                 |           | Tmax                                 | Tmean | Tmin  | Precipitation |                   |       |       |
| 1980-1992 | Y[Tmax] <sub>92i</sub>                          | 181.62    | -1.84                                | .     | .     | .             | 0.26              | 150.4 | 151.1 |
|           | Y[Tmax,Precipitation] <sub>92i</sub>            | 260.13    | -2.68                                | .     | .     | -1.62         | 0.35              | 144.4 | 145.5 |
|           | Y[Tmax,Tmin,Precipitation] <sub>92i</sub>       | 264.87    | -6.36                                |       | 5.04  | -4.80         | 0.65              | 120.2 | 117.7 |
|           | Y[Tmax,Tmean,Tmin,Precipitation] <sub>92i</sub> | 240.78    | -7.94                                | 3.77  | 3.12  | -4.62         | 0.66              | 120.4 | 117.2 |
| 1993-2002 | Y[Precipitation] <sub>02i</sub>                 | 14.65     | .                                    | .     | .     | 3.26          | 0.13              | 348.4 | 347.6 |
|           | Y[Tmax,Tmean] <sub>02i</sub>                    | 114.50    | -8.40                                | 8.43  | .     | .             | 0.37              | 318.2 | 316.1 |
|           | Y[Tmax,Tmean,Precipitation] <sub>02i</sub>      | 70.13     | -7.70                                | 8.15  | .     | 1.37          | 0.38              | 318.4 | 316.0 |
|           | Y[Tmax,Tmean,Tmin,Precipitation] <sub>02i</sub> | 69.71     | -8.12                                | 9.29  | -0.75 | 1.36          | 0.38              | 320.0 | 317.5 |
| 2003-2012 | Y[Tmin] <sub>12i</sub>                          | -62.91    | .                                    | .     | 1.57  | .             | 0.04              | 464.9 | 463.1 |
|           | Y[Tmax,Tmin] <sub>12i</sub>                     | -82.04    | -2.04                                | .     | 4.57  | .             | 0.12              | 456.1 | 453.9 |
|           | Y[Tmax,Tmin,Precipitation] <sub>12i</sub>       | -112.14   | -1.55                                | .     | 4.33  | 0.89          | 0.12              | 456.9 | 454.6 |
|           | Y[Tmax,Tmean,Tmin,Precipitation] <sub>12i</sub> | -112.28   | -1.49                                | -0.16 | 4.44  | 0.89          | 0.11              | 459.0 | 456.6 |
| 2013-2019 | Y[Tmin] <sub>19i</sub>                          | -41.37    | .                                    | .     | 1.41  | .             | 0.08              | 382.5 | 381.4 |
|           | Y[Tmax,Tmin] <sub>19i</sub>                     | 143.52    | -4.80                                | .     | 4.89  | .             | 0.29              | 357.5 | 355.3 |
|           | Y[Tmax,Tmean,Tmin] <sub>19i</sub>               | 154.70    | -4.30                                | -1.42 | 5.72  | .             | 0.29              | 359.1 | 356.7 |
|           | Y[Tmax,Tmean,Tmin,Precipitation] <sub>19i</sub> | 158.72    | -4.39                                | -1.39 | 5.73  | -0.11         | 0.28              | 361.2 | 358.7 |

Note: In the model name the notation 92 is for the time 1980 to 1992; 02 is for 1993-2002; 12 is for 2003 to 2012; and 19 is for 2013 to 2019 and ‘i’ is for irrigated zone.

Table S3. The results of linear and multilinear models for each 10- year period from time series of 1980-2019 for non-irrigated county of Mississippi.

| Period    | Model Name                                       | Intercept | Model Slope for different parameters |       |       |               | Adjusted R-square | BIC    | AIC    |
|-----------|--------------------------------------------------|-----------|--------------------------------------|-------|-------|---------------|-------------------|--------|--------|
|           |                                                  |           | Tmax                                 | Tmean | Tmin  | Precipitation |                   |        |        |
| 1980-1992 | Y[Tmax] <sub>92ni</sub>                          | 83.53     | -0.73                                | .     | .     | .             | 0.07              | 2878.5 | 2877.1 |
|           | Y[Tmax,Tmean] <sub>92ni</sub>                    | 67.79     | -2.31                                | 2.03  | .     | .             | 0.16              | 2784.3 | 2782.6 |
|           | Y[Tmax,Tmean,Tmin] <sub>92ni</sub>               | 60.85     | -4.46                                | 6.77  | -2.55 | .             | 0.19              | 2745.2 | 2743.3 |
|           | Y[Tmax,Tmean,Tmin,Precipitation] <sub>92ni</sub> | 68.50     | -4.54                                | 6.51  | -2.23 | -0.42         | 0.20              | 2737.0 | 2734.9 |
| 1993-2002 | Y[Precipitation] <sub>02ni</sub>                 | 11.21     | .                                    | .     | .     | 3.09          | 0.15              | 1246.6 | 1245.9 |
|           | Y[Tmax,Tmean] <sub>02ni</sub>                    | 136.57    | -6.59                                | 6.08  | .     | .             | 0.39              | 1129.2 | 1127.1 |
|           | Y[Tmax,Tmean,Precipitation] <sub>02ni</sub>      | 119.74    | -6.20                                | 5.82  | .     | 0.63          | 0.39              | 1128.9 | 1126.8 |
|           | Y[Tmax,Tmean,Tmin,Precipitation] <sub>02ni</sub> | 118.84    | -6.46                                | 6.43  | -0.35 | 0.64          | 0.39              | 1130.7 | 1128.5 |
| 2003-2012 | Y[Precipitation] <sub>12ni</sub>                 | 23.09     | .                                    | .     | .     | 2.22          | 0.10              | 1063.1 | 1061.9 |
|           | Y[Tmean,Tmin] <sub>12ni</sub>                    | 21.53     | .                                    | -5.38 | 6.52  | .             | 0.28              | 1005.7 | 1003.7 |
|           | Y[Tmean,Tmin,Precipitation] <sub>12ni</sub>      | -5.69     | .                                    | -4.34 | 5.67  | 0.95          | 0.28              | 1004.3 | 1002.1 |
|           | Y[Tmax,Tmean,Tmin,Precipitation] <sub>12ni</sub> | -6.06     | 0.04                                 | -4.41 | 5.69  | 0.96          | 0.28              | 1006.3 | 1004.1 |
| 2013-2019 | Y[Precipitation] <sub>19ni</sub>                 | 26.98     | .                                    | .     | .     | 2.67          | 0.08              | 744.8  | 743.2  |
|           | Y[Tmax,Tmean] <sub>19ni</sub>                    | 82.65     | -5.98                                | 6.28  | .     | .             | 0.15              | 730.5  | 728.6  |
|           | Y[Tmax,Tmean,Precipitation] <sub>19ni</sub>      | 53.80     | -4.77                                | 5.19  | .     | 1.34          | 0.17              | 729.0  | 726.9  |
|           | Y[Tmax,Tmean,Tmin,Precipitation] <sub>19ni</sub> | 75.79     | -4.34                                | 2.97  | 1.70  | 1.20          | 0.17              | 728.8  | 726.5  |

Note: In the model name the notation 92 is for the time 1980 to 1992; 02 is for 1993-2002; 12 is for 2003 to 2012; and 19 is for 2013 to 2019 and 'ni' is for non-irrigated zone.

Table S4. The results of linear and multilinear models for time series of 1980-2019 for irrigated agricultural districts of Mississippi.

| Agricultural district        | Model Name                                        | Intercept | Model Slope for different parameters |         |       |               | Adjusted R-square | BIC    | AIC    |
|------------------------------|---------------------------------------------------|-----------|--------------------------------------|---------|-------|---------------|-------------------|--------|--------|
|                              |                                                   |           | Tmax                                 | Tmean   | Tmin  | Precipitation |                   |        |        |
| <b>Upper Delta (code:10)</b> | Y[Precipitation] <sub>AG10i</sub>                 | 23.27     | .                                    | .       | .     | 2.94          | 0.09              | 936.1  | 935.0  |
|                              | Y[Tmax,Tmin] <sub>AG10i</sub>                     | 20.51     | -4.64                                | .       | 6.38  | .             | 0.28              | 886.9  | 884.8  |
|                              | Y[Tmax,Tmean,Tmin] <sub>AG10i</sub>               | 15.27     | -5.30                                | 1.58    | 5.50  | .             | 0.28              | 888.3  | 886.1  |
|                              | Y[Tmax,Tmean,Tmin,Precipitation] <sub>AG10i</sub> | -6.32     | -4.90                                | 1.54    | 5.30  | 0.63          | 0.28              | 889.8  | 887.6  |
| <b>Lower Delta (Code:40)</b> | Y[Tmin] <sub>AG40i</sub>                          | -239.77   | .                                    | .       | 4.28  | .             | 0.16              | 1079.4 | 1077.8 |
|                              | Y[Tmax,Tmin] <sub>AG40i</sub>                     | -164.43   | -3.34                                | .       | 7.54  | .             | 0.26              | 1053.7 | 1051.6 |
|                              | Y[Tmax,Tmean,Tmin] <sub>AG40i</sub>               | -175.04   | -4.88                                | 3.55    | 5.63  | .             | 0.26              | 1053.4 | 1051.2 |
|                              | Y[Tmax,Tmean,Tmin,Precipitation] <sub>AG40i</sub> | -198.97   | -4.48                                | 3.56    | 5.41  | 0.67          | 0.26              | 1054.9 | 1052.7 |
| <b>Central (Code:50)</b>     | Y[Tmin] <sub>AG50i</sub>                          | -155.79   | .                                    | .       | 3.00  | .             | 0.06              | 227.9  | 226.0  |
|                              | Y[Tmin,Precipitation] <sub>AG50i</sub>            | -210.18   | .                                    | .       | 3.61  | 3.43          | 0.13              | 225.8  | 223.3  |
|                              | Y[Tmax,Tmean,Tmin] <sub>AG50i</sub>               | -71.16    | 74.74                                | -155.26 | 83.18 | .             | 0.12              | 227.4  | 224.6  |
|                              | Y[Tmax,Tmean,Tmin,Precipitation] <sub>AG50i</sub> | -142.77   | 66.67                                | -136.02 | 72.47 | 2.19          | 0.12              | 229.0  | 225.8  |

Note: In the model name, the notation AG10, AG40 and AG50 are for the agricultural district code 10, 40 and 50, respectively; The notation 'i' is for irrigated zone in the agricultural district.

Table S5. The results of linear and multilinear models for time series of 1980-2019 for non-irrigated agricultural districts of Mississippi.

| Agricultural district          | Model Name                                         | Intercept | Model Slope for different parameters |       |       |               | Adjusted R-square | BIC    | AIC    |
|--------------------------------|----------------------------------------------------|-----------|--------------------------------------|-------|-------|---------------|-------------------|--------|--------|
|                                |                                                    |           | Tmax                                 | Tmean | Tmin  | Precipitation |                   |        |        |
| <b>Upper Delta (code:10)</b>   | Y[Tmax] <sub>AG10ni</sub>                          | 185.75    | -1.92                                | .     | .     | .             | 0.35              | 121.0  | 121.9  |
|                                | Y[Tmax,Tmean] <sub>AG10ni</sub>                    | 80.41     | -5.59                                | 5.63  | .     | .             | 0.53              | 108.1  | 108.6  |
|                                | Y[Tmax,Tmean,Precipitation] <sub>AG10ni</sub>      | 116.91    | -7.17                                | 7.10  | .     | -2.72         | 0.73              | 89.1   | 86.1   |
|                                | Y[Tmax,Tmean,Tmin,Precipitation] <sub>AG10ni</sub> | 118.47    | -7.18                                | 6.64  | 0.54  | -2.89         | 0.73              | 91.1   | 87.8   |
| <b>North Central (Code:20)</b> | Y[Precipitation] <sub>AG20ni</sub>                 | 13.60     | .                                    | .     | .     | 3.07          | 0.11              | 1341.8 | 1340.2 |
|                                | Y[Tmax,Tmean] <sub>AG20ni</sub>                    | 50.27     | -5.86                                | 6.43  | .     | .             | 0.19              | 1313.3 | 1311.3 |
|                                | Y[Tmax,Tmean,Precipitation] <sub>AG20ni</sub>      | 8.49      | -4.61                                | 5.46  | .     | 1.49          | 0.20              | 1310.0 | 1307.9 |
|                                | Y[Tmax,Tmean,Tmin,Precipitation] <sub>AG20ni</sub> | 8.69      | -4.57                                | 5.38  | 0.05  | 1.49          | 0.20              | 1312.0 | 1309.9 |
| <b>Northeast (Code: 30)</b>    | Y[Precipitation] <sub>AG30ni</sub>                 | 17.14     | .                                    | .     | .     | 1.94          | 0.05              | 1247.2 | 1245.6 |
|                                | Y[Tmax,Tmean] <sub>AG30ni</sub>                    | 40.42     | -4.17                                | 4.63  | .     | .             | 0.15              | 1218.0 | 1216.0 |
|                                | Y[Tmax,Tmean,Tmin] <sub>AG30ni</sub>               | 42.65     | -3.68                                | 3.13  | 1.07  | .             | 0.15              | 1218.5 | 1216.4 |
|                                | Y[Tmax,Tmean,Tmin,Precipitation] <sub>AG30ni</sub> | 50.71     | -3.85                                | 3.06  | 1.27  | -0.33         | 0.14              | 1220.3 | 1218.1 |
| <b>Lower Delta (Code:40)</b>   | Y[Tmax] <sub>AG40ni</sub>                          | 114.12    | -1.03                                | .     | .     | .             | 0.04              | 436.9  | 435.1  |
|                                | Y[Tmax,Tmean] <sub>AG40ni</sub>                    | 71.13     | -3.24                                | 3.09  | .     | .             | 0.06              | 435.0  | 432.9  |
|                                | Y[Tmax,Tmean,Tmin] <sub>AG40ni</sub>               | 72.87     | -4.72                                | 7.42  | -3.10 | .             | 0.09              | 432.7  | 430.4  |
|                                | Y[Tmax,Tmean,Tmin,Precipitation] <sub>AG40ni</sub> | 68.12     | -4.58                                | 7.45  | -3.27 | 0.20          | 0.08              | 434.8  | 432.3  |



Table S5. (continued...)

|                                                 |                                                    |         |        |       |       |       |      |        |        |
|-------------------------------------------------|----------------------------------------------------|---------|--------|-------|-------|-------|------|--------|--------|
| <b>Central<br/>(Code:50)</b>                    | Y[Tmin] <sub>AG50ni</sub>                          | -130.46 | .      | .     | 2.49  | .     | 0.11 | 1144.9 | 1143.3 |
|                                                 | Y[Tmin,Precipitation] <sub>AG50ni</sub>            | -137.03 | .      | .     | 2.40  | 2.78  | 0.20 | 1117.3 | 1115.3 |
|                                                 | Y[Tmax,Tmean,Precipitation] <sub>AG50ni</sub>      | -130.17 | -3.26  | 5.72  | .     | 2.41  | 0.22 | 1114.0 | 1111.8 |
|                                                 | Y[Tmax,Tmean,Tmin,Precipitation] <sub>AG50ni</sub> | -131.82 | -3.51  | 6.36  | -0.39 | 2.45  | 0.21 | 1116.0 | 1113.8 |
| <b>East central<br/>(Code: 60)</b>              | Y[Tmin] <sub>AG60ni</sub>                          | -113.27 | .      | .     | 2.20  | .     | 0.09 | 1024.1 | 1023.0 |
|                                                 | Y[Tmax,Tmean] <sub>AG60ni</sub>                    | -27.06  | -8.06  | 10.00 | .     | .     | 0.28 | 969.7  | 967.8  |
|                                                 | Y[Tmax,Tmean,Precipitation] <sub>AG60ni</sub>      | 16.36   | -10.11 | 11.89 | .     | -1.71 | 0.30 | 964.3  | 962.1  |
|                                                 | Y[Tmax,Tmean,Tmin,Precipitation] <sub>AG60ni</sub> | 14.98   | -11.41 | 14.57 | -1.39 | -1.67 | 0.30 | 966.2  | 963.9  |
| <b>Southwest<br/>(Code: 70)</b>                 | Y[Tmin] <sub>AG70ni</sub>                          | -219.04 | .      | .     | 3.81  | .     | 0.23 | 832.8  | 831.5  |
|                                                 | Y[Tmax,Tmean] <sub>AG70ni</sub>                    | -106.64 | -8.23  | 11.21 | .     | .     | 0.34 | 804.0  | 802.1  |
|                                                 | Y[Tmax,Tmean,Precipitation] <sub>AG70ni</sub>      | -35.22  | -9.86  | 12.25 | .     | -1.82 | 0.36 | 799.6  | 797.4  |
|                                                 | Y[Tmax,Tmean,Tmin,Precipitation] <sub>AG70ni</sub> | -26.33  | -8.24  | 8.47  | 2.11  | -1.92 | 0.36 | 800.4  | 798.1  |
| <b>South<br/>Central<br/>(Code: 80)</b>         | Y[Tmin] <sub>AG80ni</sub>                          | -162.45 | .      | .     | 2.92  | .     | 0.17 | 602.1  | 600.6  |
|                                                 | Y[Tmax,Tmin] <sub>AG80ni</sub>                     | -53.66  | -2.48  | .     | 4.60  | .     | 0.25 | 587.5  | 585.7  |
|                                                 | Y[Tmax,Tmin,Precipitation] <sub>AG80ni</sub>       | 16.53   | -3.88  | .     | 5.57  | -2.26 | 0.29 | 580.7  | 578.4  |
|                                                 | Y[Tmax,Tmean,Tmin,Precipitation] <sub>AG80ni</sub> | 12.64   | -4.87  | 2.09  | 4.51  | -2.22 | 0.29 | 582.6  | 580.2  |
| <b>Southeast<br/>and Coastal<br/>(Code: 90)</b> | Y[Tmax] <sub>AG90ni</sub>                          | 130.46  | -1.25  | .     | .     | .     | 0.08 | 648.6  | 646.6  |
|                                                 | Y[Tmax,Tmean] <sub>AG90ni</sub>                    | 124.33  | -1.48  | 0.35  | .     | .     | 0.08 | 650.2  | 648.1  |
|                                                 | Y[Tmax,Tmean,Tmin] <sub>AG90ni</sub>               | 123.80  | -3.41  | 4.26  | -1.98 | .     | 0.07 | 651.6  | 649.4  |
|                                                 | Y[Tmax,Tmean,Tmin,Precipitation] <sub>AG90ni</sub> | 121.52  | -3.39  | 4.33  | -2.07 | 0.16  | 0.07 | 653.5  | 651.2  |

Note: In the model name, the notation AG10, AG20, AG30, AG40, AG50, AG60, AG70, AG80, and AG90 are for the agricultural district codes 10, 20, 30, 40, 50, 60, 70, 80, and 90, respectively; The notation 'ni' is for non-irrigated zone in the agricultural district.

Table S6. The results of linear and multilinear models for irrigated and non-irrigated zone of Mississippi of 1980-2019 period.

| Zone                             | Model Name                                       | Intercept | Model Slope for different parameters |       |       |               | Adjusted R-square | BIC    | AIC    |
|----------------------------------|--------------------------------------------------|-----------|--------------------------------------|-------|-------|---------------|-------------------|--------|--------|
|                                  |                                                  |           | Tmax                                 | Tmean | Tmin  | Precipitation |                   |        |        |
| <b>Mississippi Irrigated</b>     | Y[Tmin] <sub>MSi</sub>                           | -165.10   | .                                    | .     | 3.12  | .             | 0.11              | 2292.4 | 2291.0 |
|                                  | Y[Tmax,Tmin] <sub>MSi</sub>                      | -90.53    | -3.52                                | .     | 6.64  | .             | 0.23              | 2224.2 | 2222.2 |
|                                  | Y[Tmax,Tmin,Precipitation] <sub>MSi</sub>        | -138.02   | -2.62                                | .     | 6.09  | 1.50          | 0.24              | 2220.0 | 2218.0 |
|                                  | Y[Tmax,Tmean,Tmin,Precipitation] <sub>MSi</sub>  | -144.86   | -3.93                                | 2.96  | 4.48  | 1.48          | 0.24              | 2218.3 | 2216.2 |
| <b>Mississippi Non-Irrigated</b> | Y[Precipitation] <sub>MSni</sub>                 | 19.60     | .                                    | .     | .     | 1.33          | 0.03              | 7703.7 | 7702.2 |
|                                  | Y[Tmax,Tmean] <sub>MSni</sub>                    | 53.55     | -4.47                                | 4.77  | .     | .             | 0.14              | 7486.6 | 7484.6 |
|                                  | Y[Tmax,Tmean,Precipitation] <sub>MSni</sub>      | 59.04     | -4.68                                | 4.95  | .     | -0.26         | 0.14              | 7487.1 | 7485.0 |
|                                  | Y[Tmax,Tmean,Tmin,Precipitation] <sub>MSni</sub> | 58.88     | -4.71                                | 5.02  | -0.04 | -0.26         | 0.14              | 7489.1 | 7487.0 |

Note: In the model name, the notation MS is for Mississippi state; The notation 'i' is for irrigated zone and 'ni' for non-irrigated zones in the Mississippi state.
